# Supplementary material
Source: publisher figshare collection journal article supplement (https://acs.figshare.com/ndownloader/files/11827658)
Supplement: Supplementary file 1 [file 11827658]

# Toxic metal sequestration exploiting an unprecedented low molecular weight hydrogel to metallogel transformation

Avik De,<sup>†</sup> and Raju Mondal<sup>\*†</sup>

<sup>†</sup>Department of Inorganic Chemistry, Indian Association for the Cultivation of Science, 2A &  
2B Raja S. C. Mullick Road, Jadavpur, Kolkata 700 032, India.

---

## Contents

### **1. Synthetic procedure of BP3D:**

Scheme S1 BP3D synthesis

### **2. UV-Vis titration:**

Figure S1 UV-Vis titration of BP3D with Hg plot in DMSO:Water=1:1 medium

Figure S2 Job's plot of UV-Vis titration of BP3D with Hg plot

Figure S3 UV-Vis titration of BP3D with Cd plot in DMSO:Water=1:1 medium

### **3. IR Spectra:**

Figure S4 IR spectra of BP3DH

Figure S5 IR spectra of xerogels of **G-Pb**

Figure S6 IR spectra of xerogels of **G-Hg**

Figure S7 IR spectra of xerogels of **G-Cd**

### **4. NMR Spectra:**

Figure S8. <sup>1</sup>H NMR Spectra of BP3D

Figure S9. <sup>13</sup>C NMR Spectra of BP3D

Figure S10. <sup>1</sup>H NMR Spectra of Pb Complex of BP3D

Figure S11. <sup>13</sup>C NMR Spectra of Pb Complex of BP3D

Figure S12. <sup>1</sup>H NMR Spectra of Hg Complex of BP3D

Figure S13. <sup>13</sup>C NMR Spectra of Hg Complex of BP3D

Figure S14. <sup>1</sup>H NMR Spectra of Cd Complex of BP3D

Figure S15. <sup>13</sup>C NMR Spectra of Cd Complex of BP3D

### **5. SAED & EDAX data:**

Figure S16. EDAX data of Pb NMOP

Figure S17. SAED data of Pb NMOP

Figure S18. EDAX data of Hg NMOP  
Figure S19. SAED data of Hg NMOP  
Figure S20. SAED data of Cd NMOP

**6. Atomic Force Microscopic data:**

Figure S21. Height profile data of AFM images of **G-Pb**  
Figure S22. Height profile data of AFM images of **G-Hg**  
Figure S23. Height profile data of AFM images of **G-Cd**

**7. Powder X-ray Diffraction Data:**

Figure S24. PXRD patterns of xerogels of **G-Pb**  
Figure S25. PXRD patterns of xerogels of **G-Hg**

**8. Rheological Data:**

Figure S26. stress sweep data for a gel of **G-L**  
Figure S27. stress sweep data for **G-Pb**  
Figure S28. stress sweep data for **G-Hg**  
Figure S29. stress sweep data for **G-Cd**

**9. Representative Procedure for ICP Samples:**

Preparation of sample for Hg estimation:  
Preparation of sample for Pb & Cd estimation

**10. Thixotropy property:**

Figure S30 Images depicting thixotropic behaviour of **G-Pb**

**11. Gelation experiment with solvent variation & metal concentration variation:**

Figure S31 Variation of Water:DMSO ratio for Pb metallogelation  
Figure S32 Variation of Pb concentration for Pb metallogelation  
Figure S33 Variation of Water:DMSO ratio for Hg metallogelation  
Figure S34 Variation of Hg concentration for Hg metallogelation  
Figure S35 Variation of Water:DMSO ratio for Cd metallogelation  
Figure S36 Variation of Cd concentration for Cd metallogelation

**12. Gelation experiment using different salts of Pb, Hg & Cd:**

Table S1 Comparative study of the test for gelation of the ligand in presence of different Pb, Cd & Hg salts in DMSO/water medium

**13. Chemical responsiveness of hydrogel with Hg salt solution:**

Figure S37 Set of images of effect of Hg salt solution with time (one day interval) over hydrogel (at righted condition with solution inside except the first one), first one is blank and second one is captured instantly after adding solution  
Figure S38 Set of images of effect of Hg salt solution with time (one day interval) over hydrogel (at inverted condition), first one is blank and second one is captured instantly after adding solution

**1. Synthetic procedure of BP3D:**

N<sup>2</sup>,N<sup>6</sup>-bis(5(3)-(pyridin-2-yl)-1H-pyrazole-3(5)-carbonyl)-pyridine-2,6-dicarbohydrazide (BP3D) was prepared by the reaction of 3-(pyridin-2-yl)-1H-pyrazole-5-carbohydrazide with 2,6-Pyridinedicarbonyl dichloride. 2,6-Pyridinedicarbonyl dichloride (2.04 g, 10 mmol) was dissolved in dry acetonitrile and to it 3-(pyridin-2-yl)-1H-pyrazole-5-carbohydrazide (10.75 g, 20 mmol) was added, giving an immediate white suspension. The reaction mixture was refluxed overnight at 80°C, cooled and filtered. The precipitate was washed with acetonitrile and dried in vacuum. To the suspension of the hydrochloride salt in water, was added saturated sodium bicarbonate solution till slightly basic and stirred at room temperature overnight. The precipitated solid was filtered, washed with water, dried and purified from DMF/Water.

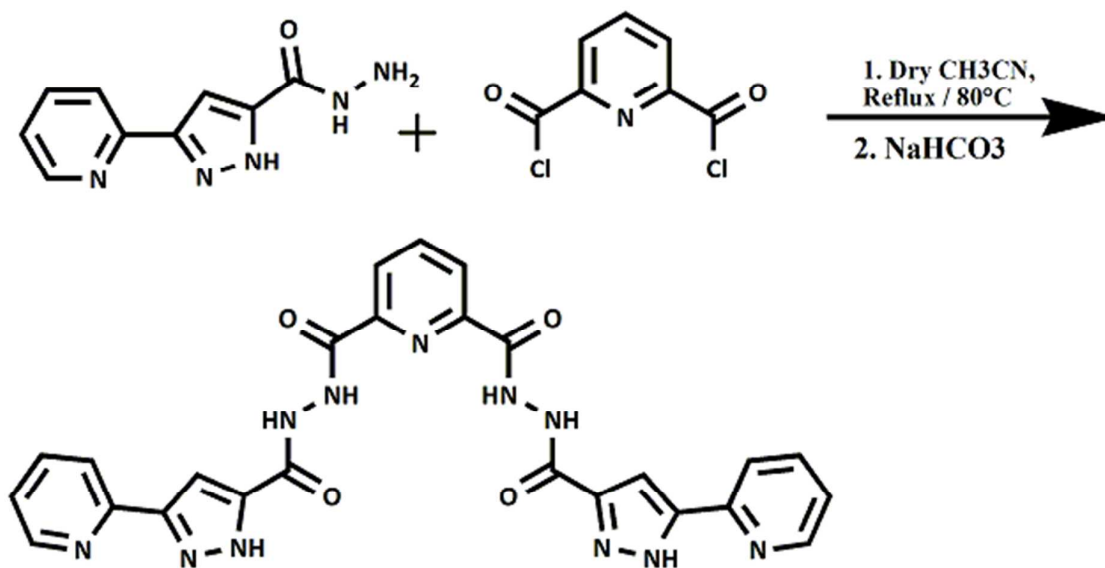

Scheme S1 BP3D synthesis

## 2. UV-Vis titration:

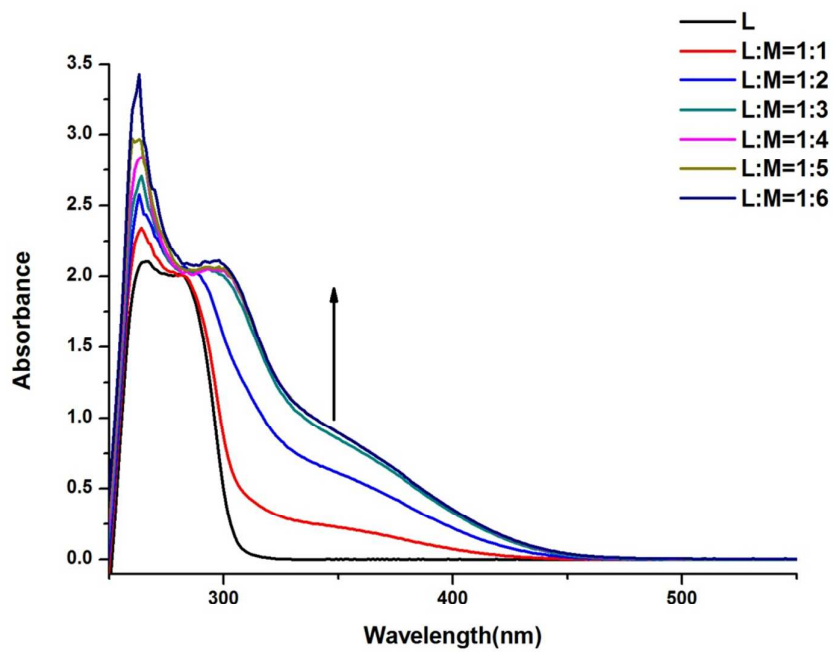

Figure S1 UV-Vis titration of BP3D with Hg plot

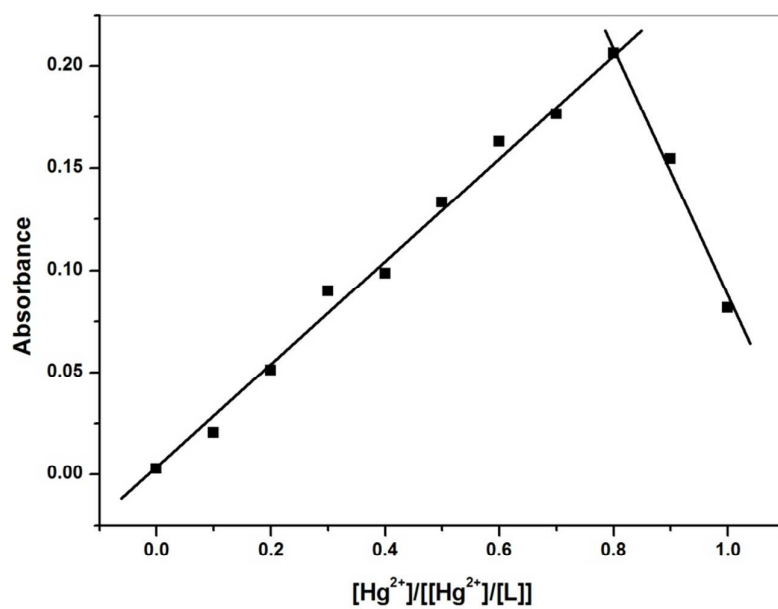

Figure S2 Job's plot of UV-Vis titration of BP3D with Hg plot

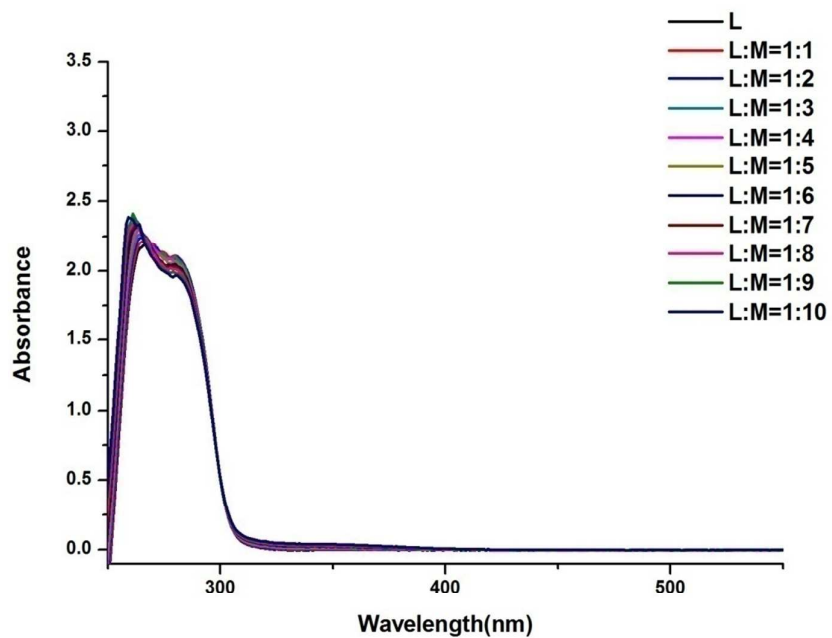

Figure S3 UV-Vis titration of BP3D with Cd plot in DMSO:Water=1:1 medium

### 3. IR Spectra:

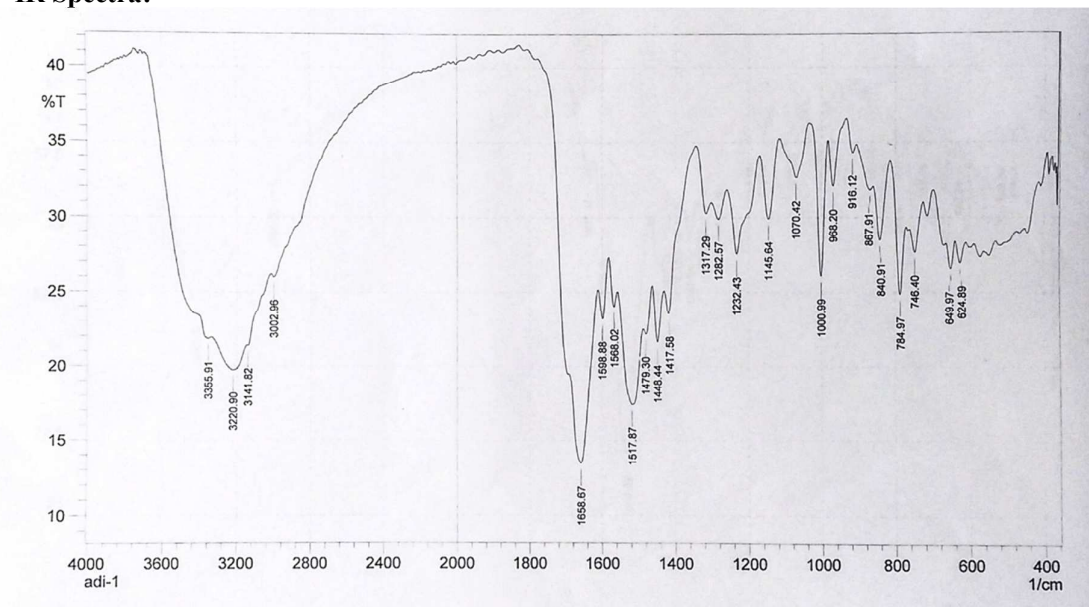

Figure S4 IR spectra of BP3DH

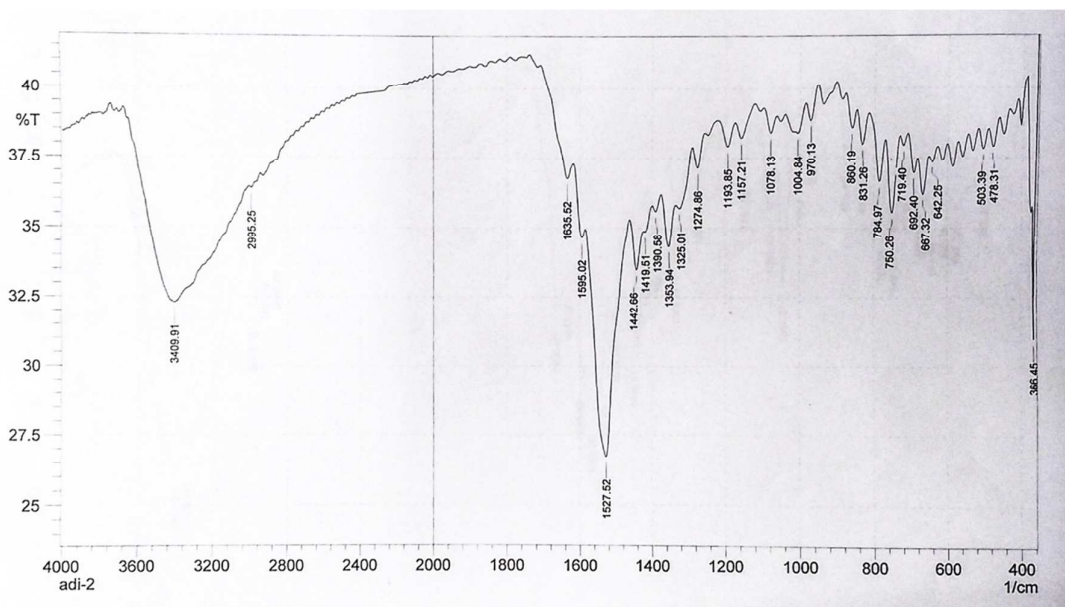

Figure S5 IR spectra of xerogels of G-Pb

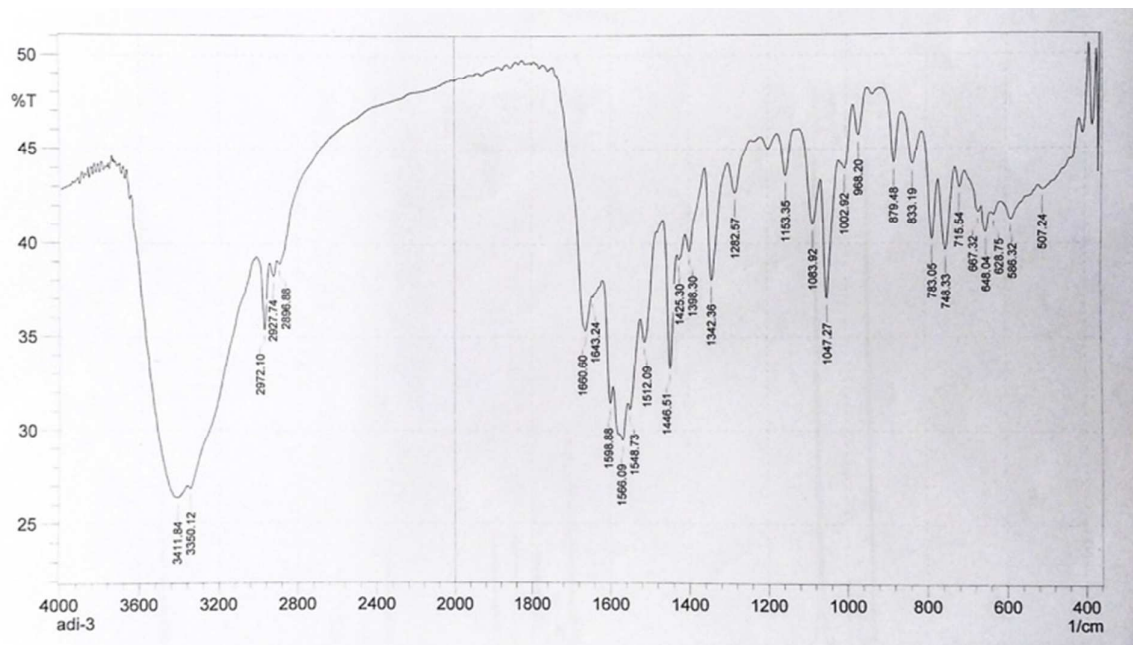

Figure S6 IR spectra of xerogels of G-Hg

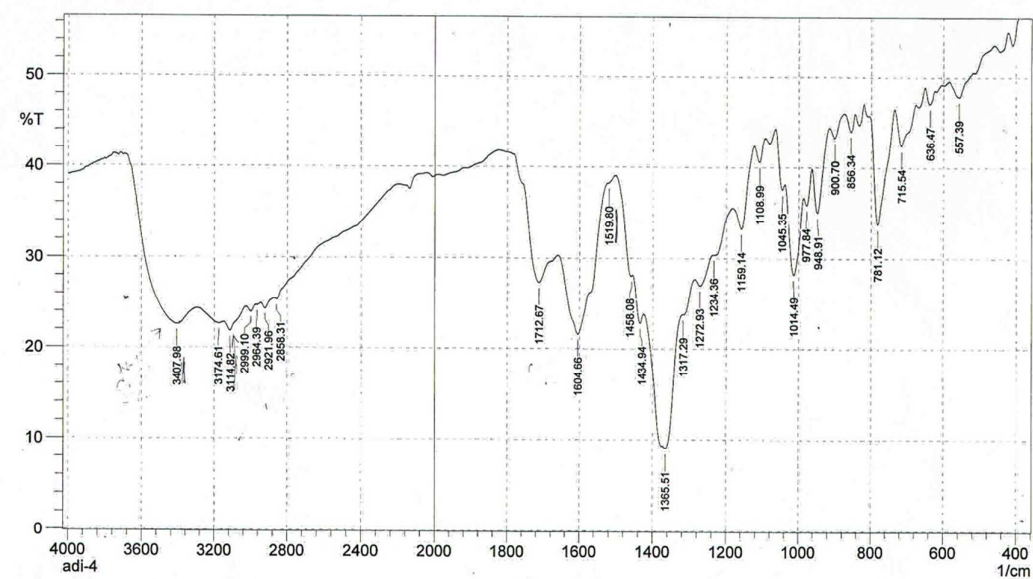

Figure S7 IR spectra of xerogels of G-Cd

#### 4. NMR Spectra:

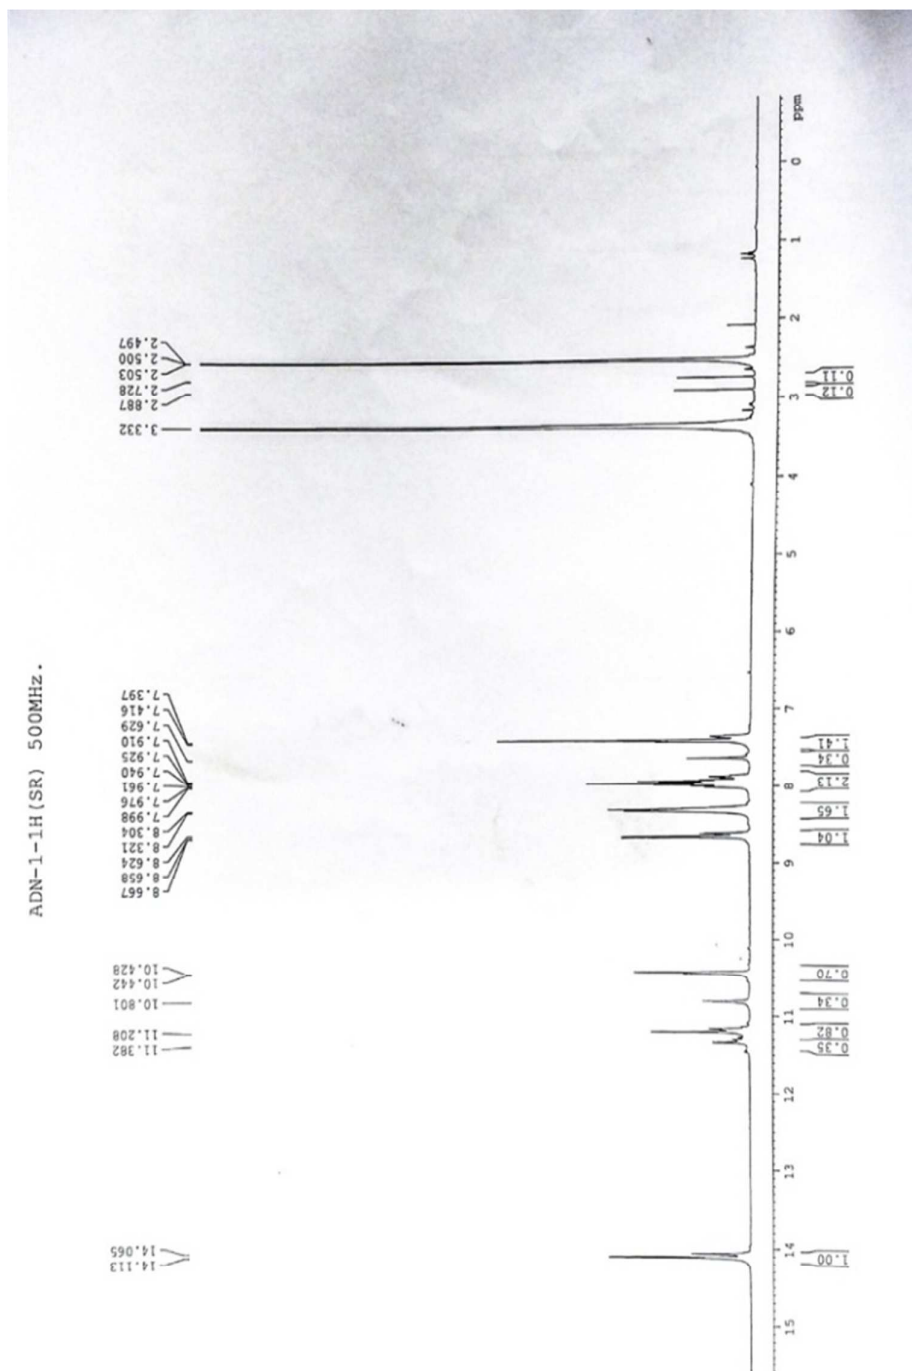

Figure S8. <sup>1</sup>H NMR Spectra of BP3D



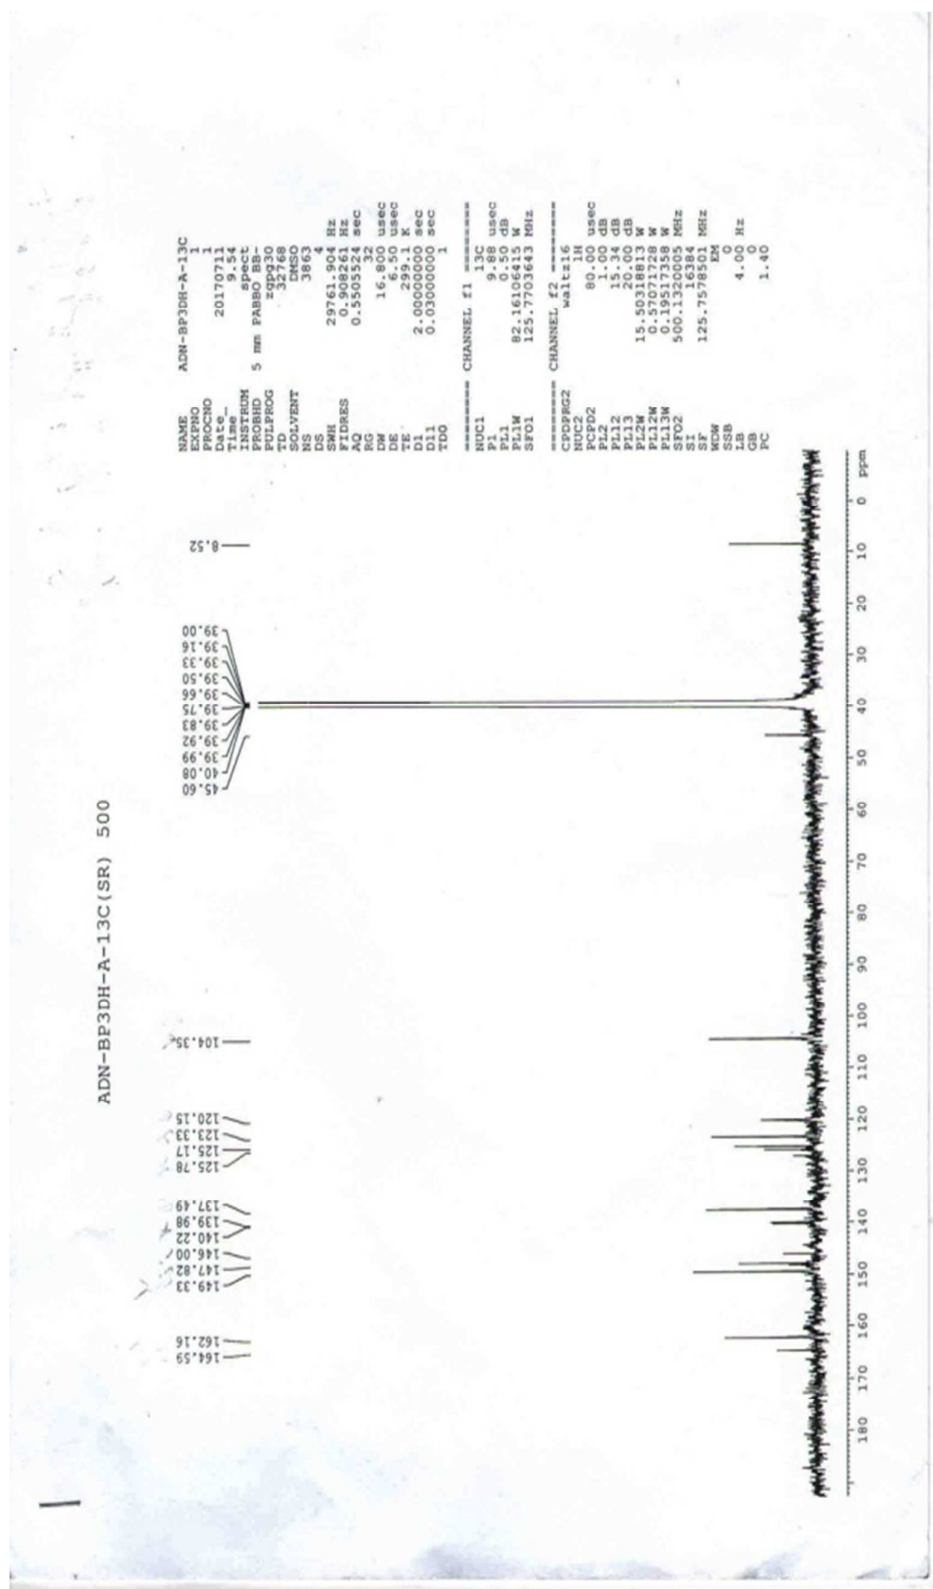

Figure S9. <sup>13</sup>C NMR Spectra of BP3D

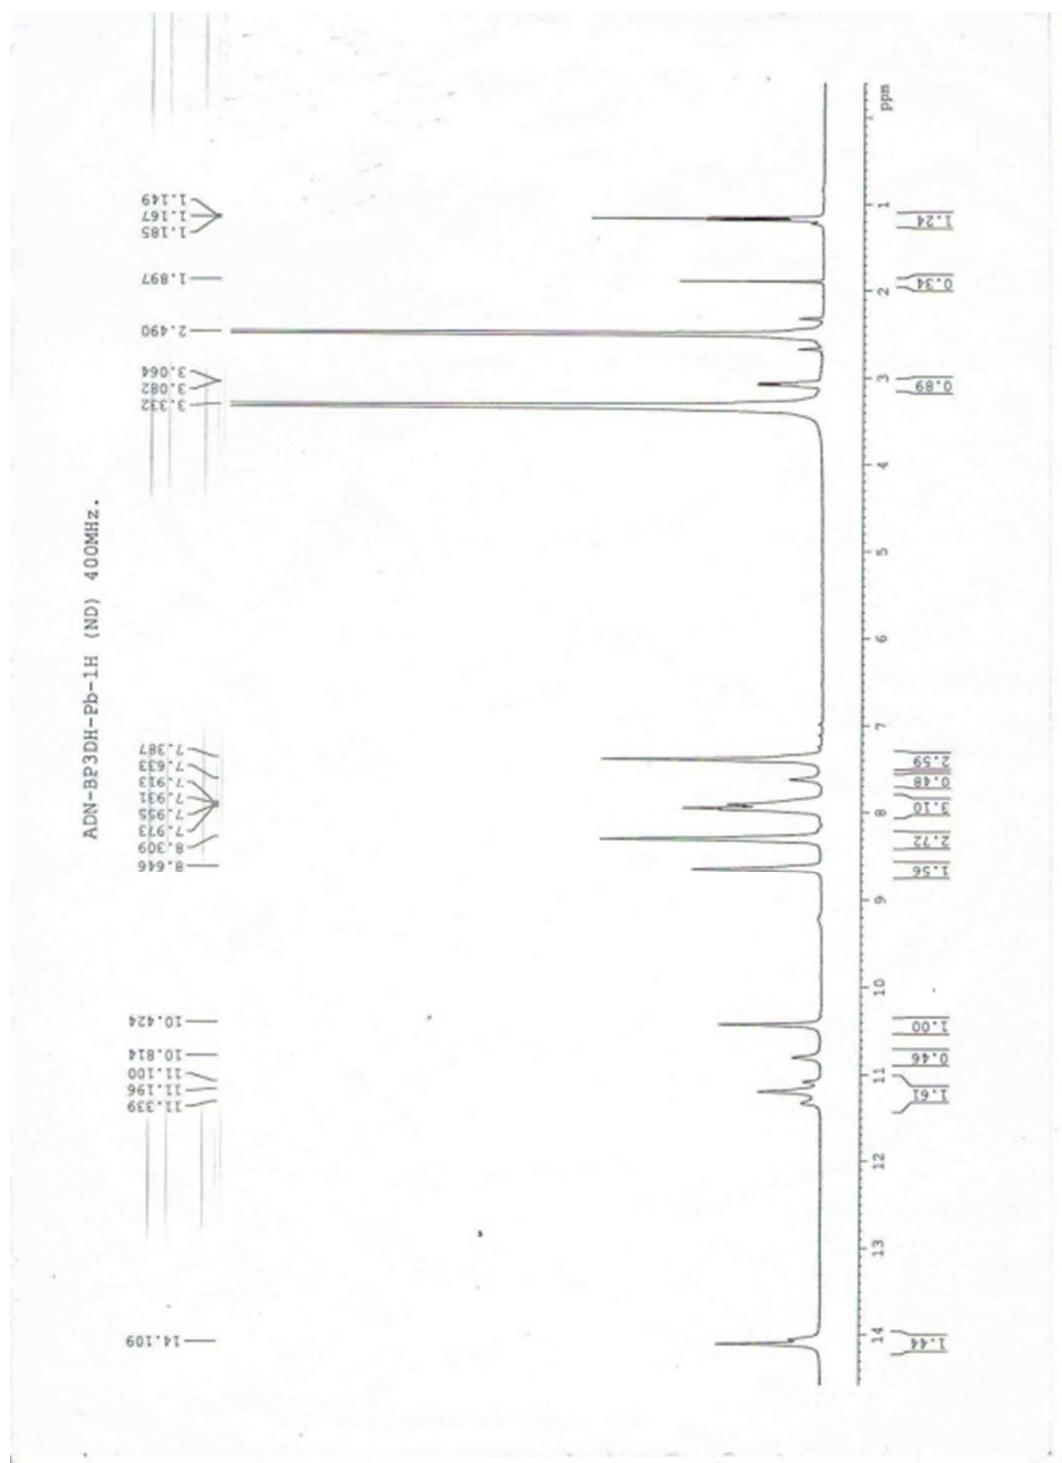

Figure S10.  $^1\text{H}$  NMR Spectra of Pb Complex of BP3D

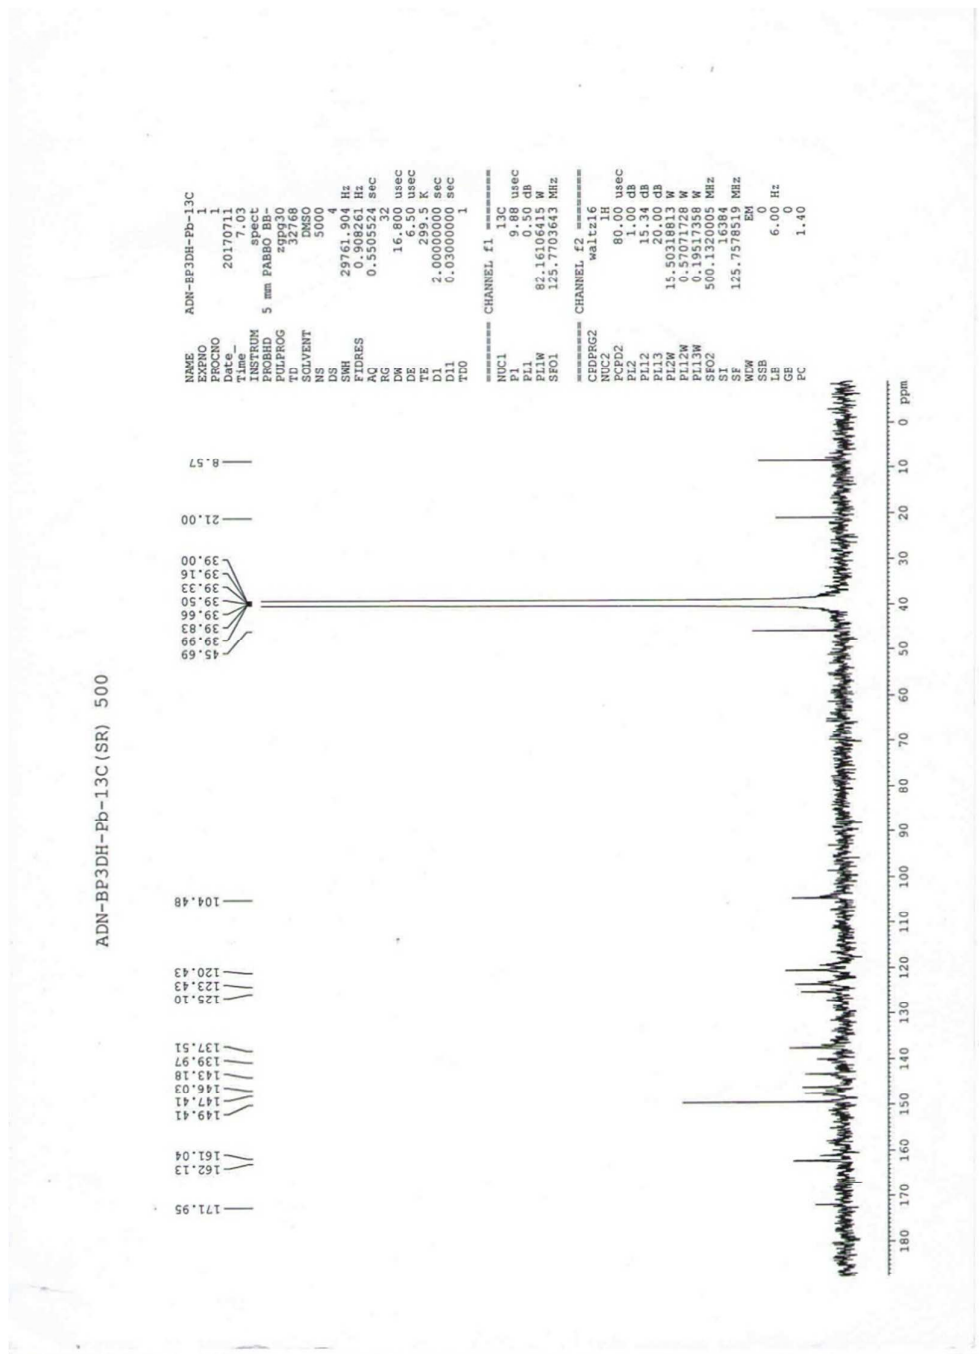

Figure S11. <sup>13</sup>C NMR Spectra of Pb Complex of BP3D

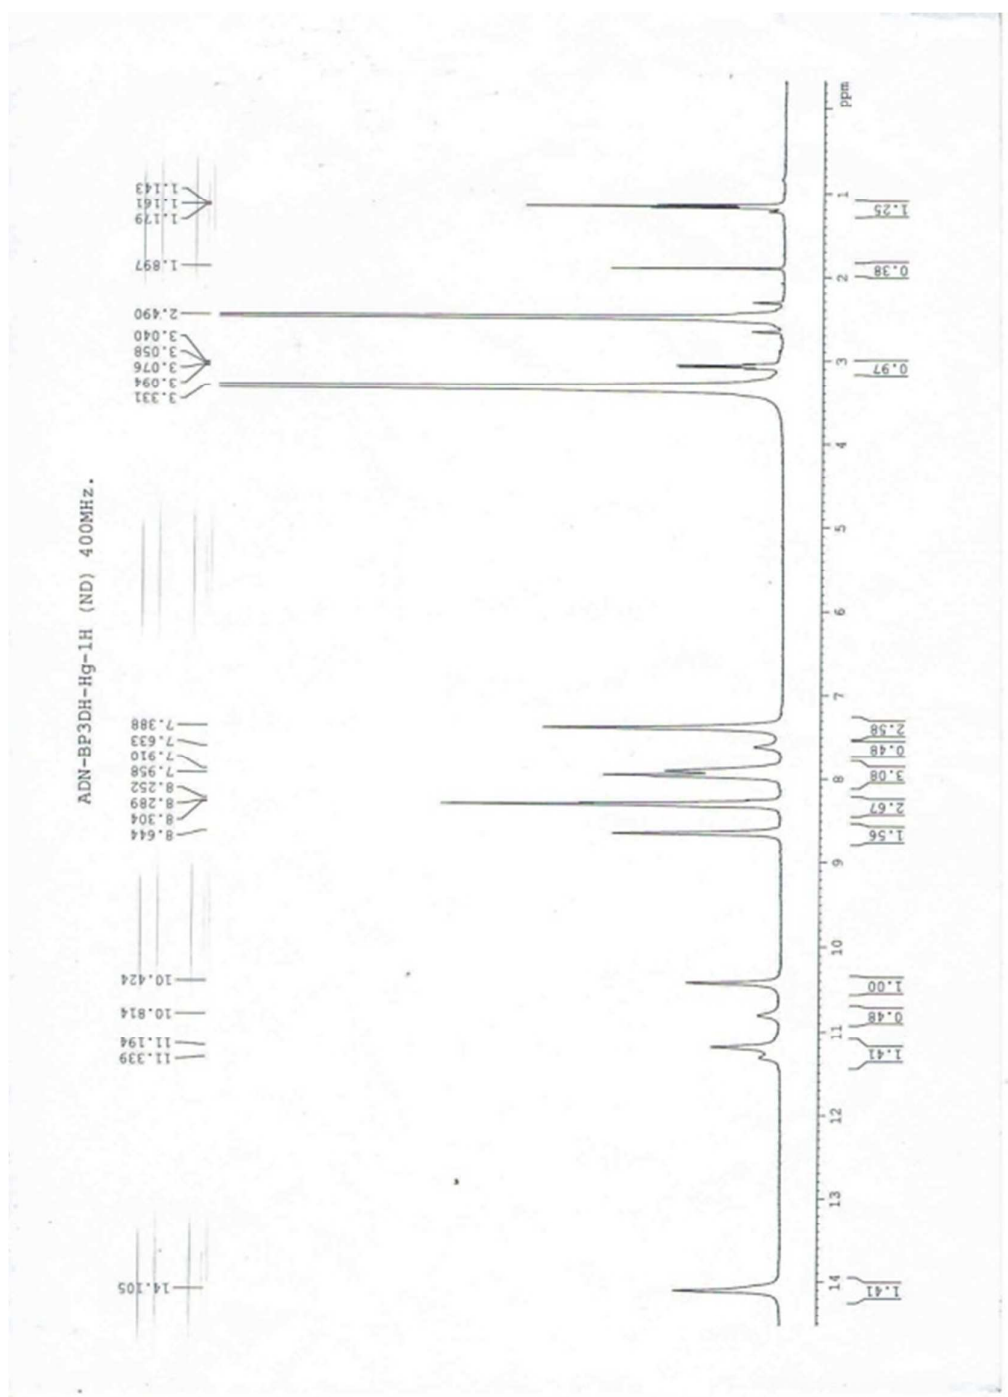

Figure S12.  $^1\text{H}$  NMR Spectra of Hg Complex of BP3D

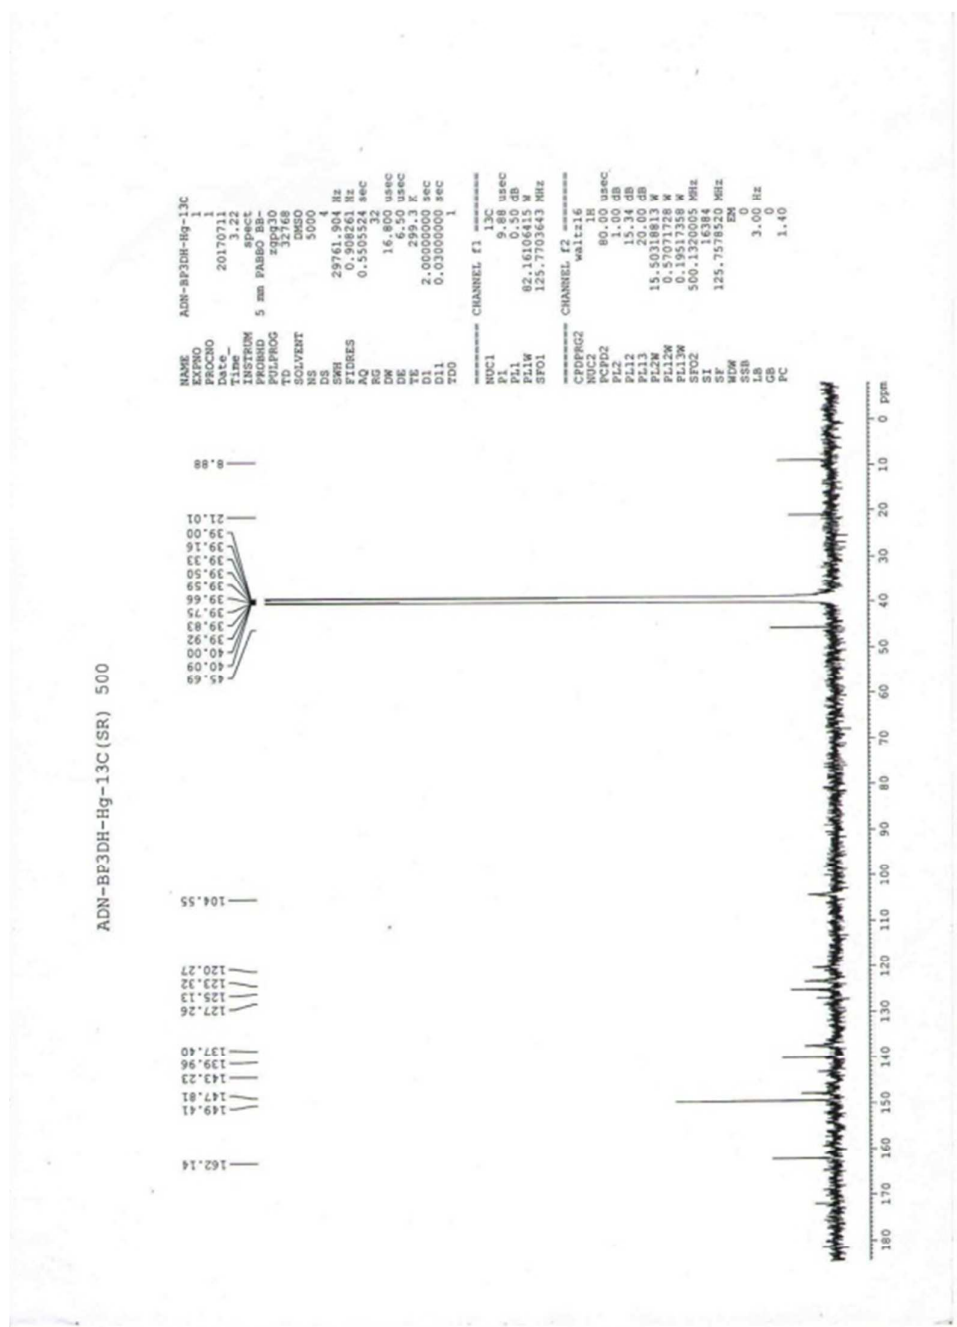

Figure S13. <sup>13</sup>C NMR Spectra of Hg Complex of BP3D

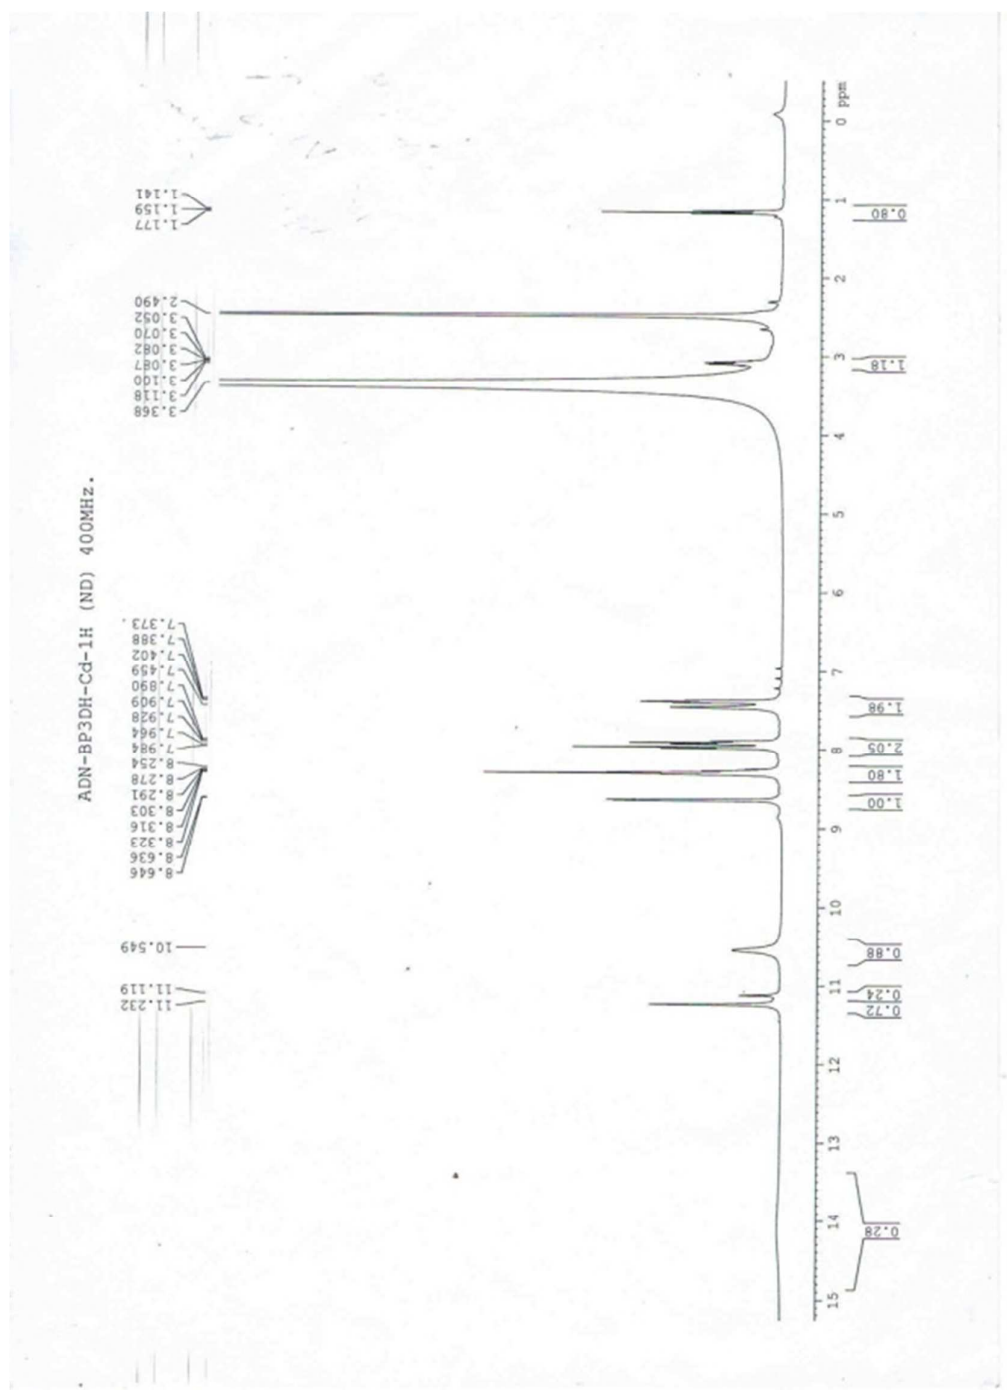

Figure S14.  $^1\text{H}$  NMR Spectra of Cd Complex of BP3D



**5. SAED & EDAX data:**

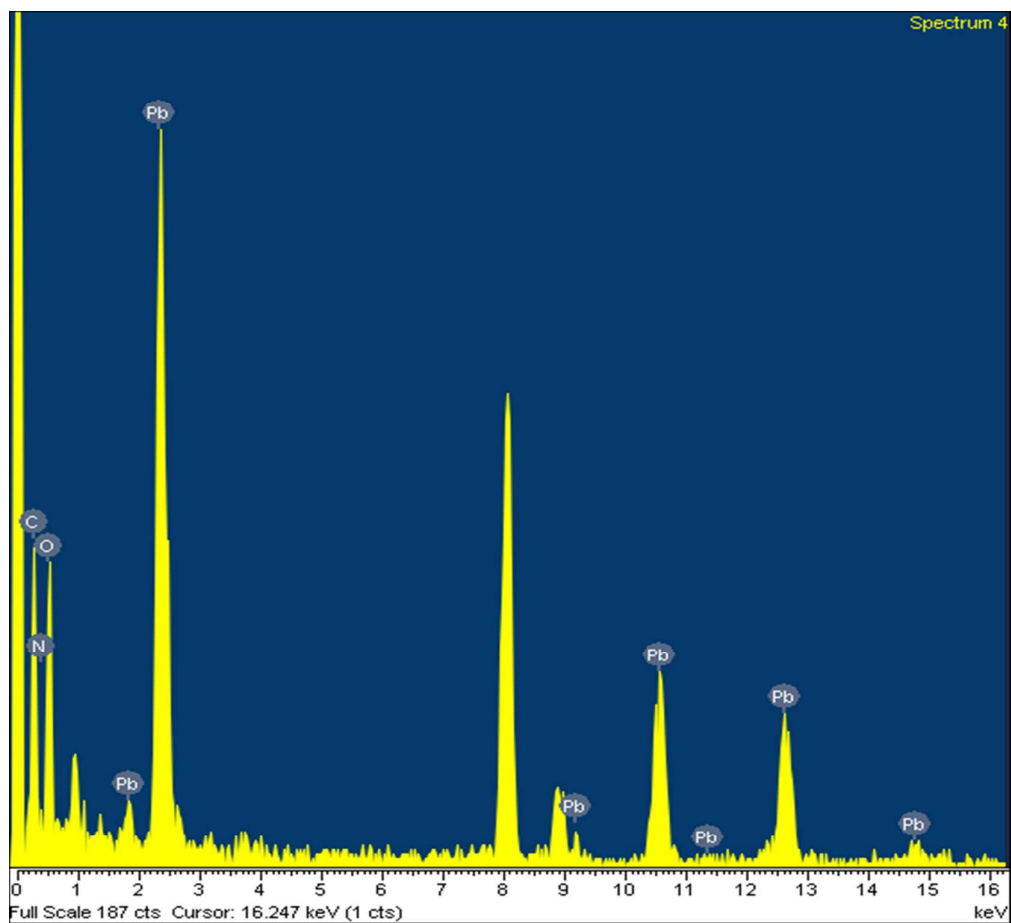

Figure S16. EDAX data of Pb NMOP

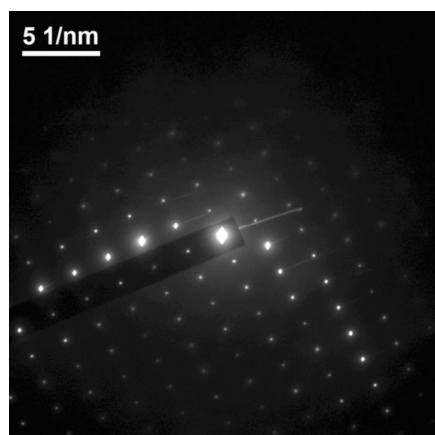

Figure S17. SAED data of Pb NMOP



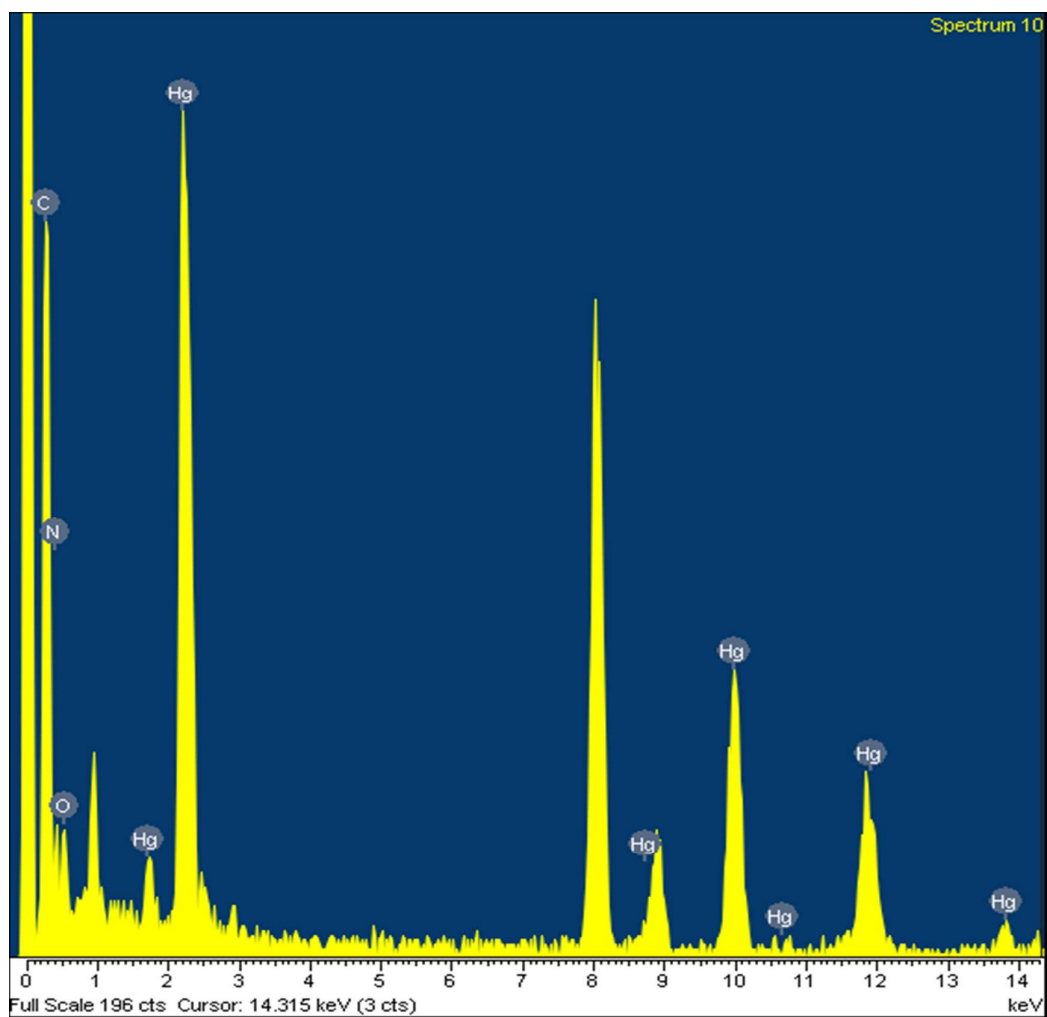

Figure S18. EDAX data of Hg NMOP

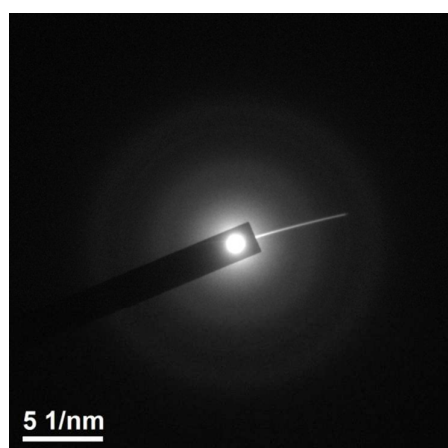

Figure S19. SAED data of Hg NMOP

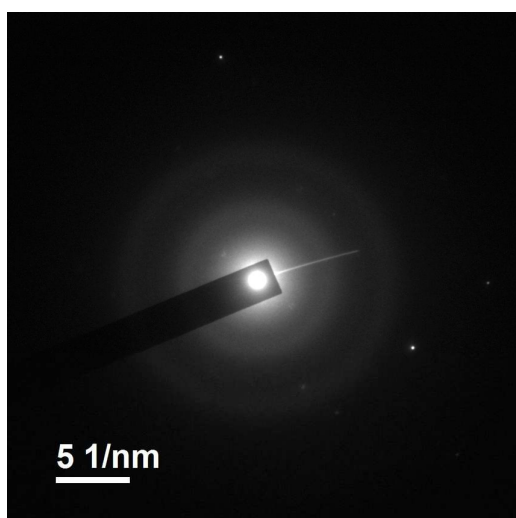

Figure S20. SAED data of Cd NMOP

## 6. Atomic Force Microscopic data:

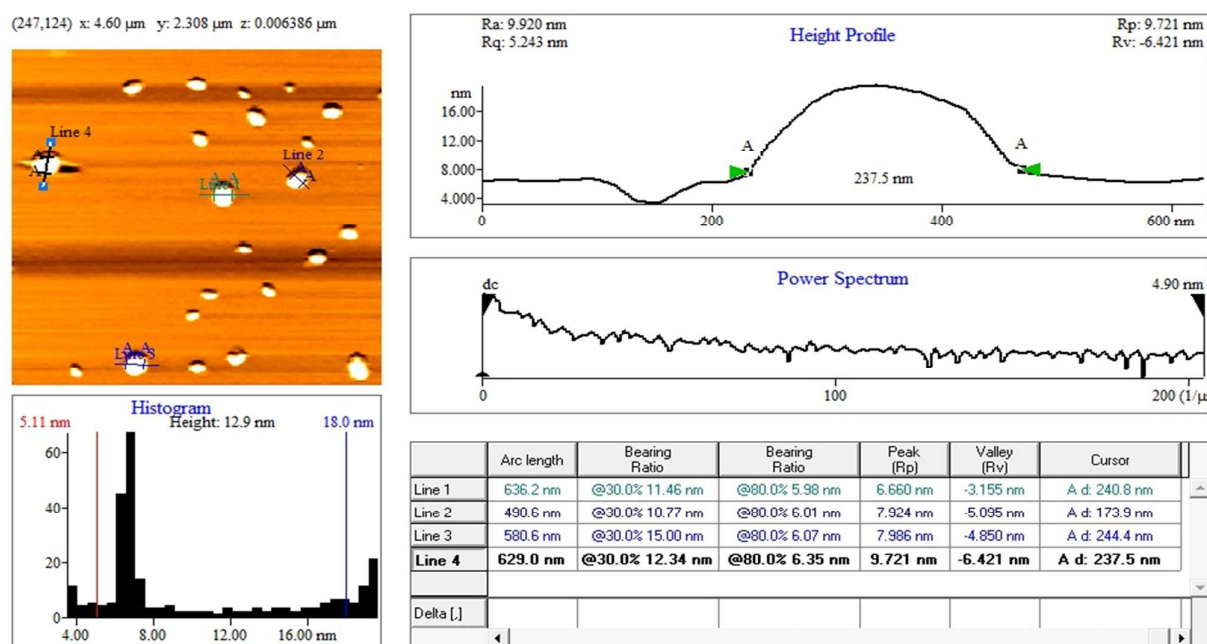

Figure S21. Height profile data of AFM images of G-Pb

(181,248) x: 1.06  $\mu\text{m}$  y: 1.446  $\mu\text{m}$  z: -0.1606 V

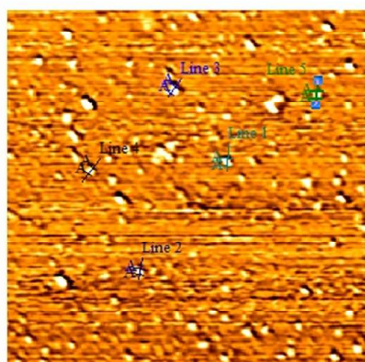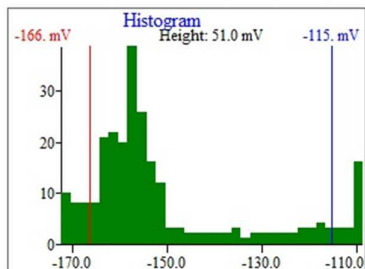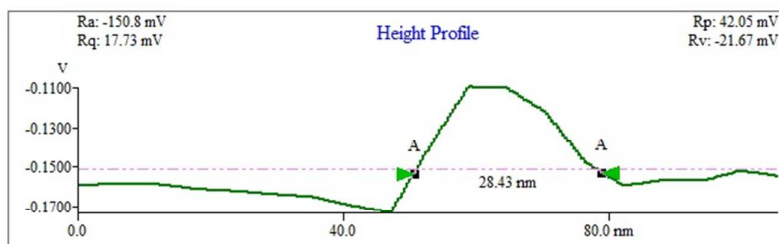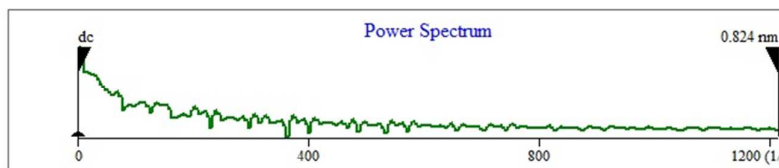

|           | Ave Rough (Ra) | Mean Ht   | Median H  | Arc length | Bearing Ratio | Bearing Ratio | Peak (Rp) | Valley (Rv) | Cursor        |
|-----------|----------------|-----------|-----------|------------|---------------|---------------|-----------|-------------|---------------|
| Line 1    | 16.35 mV       | -149.2 mV | -155.3 mV | 44.1 m     | 1.0% -149.31  | 1.0% -161.17  | 30.34 mV  | -34.58 mV   | A d: 29.30 nm |
| Line 2    | 13.48 mV       | -149.7 mV | -154.4 mV | 58.7 m     | 1.0% -145.65  | 1.0% -160.86  | 14.21 mV  | -27.99 mV   | A d: 27.16 nm |
| Line 3    | 25.45 mV       | -138.2 mV | -149.1 mV | 42.4 m     | 1.0% -127.42  | 1.0% -161.33  | 36.56 mV  | -40.25 mV   | A d: 35.39 nm |
| Line 4    | 11.04 mV       | -150.2 mV | -154.0 mV | 81.6 m     | 1.0% -148.82  | 1.0% -161.55  | 11.63 mV  | -20.29 mV   | A d: 35.97 nm |
| Line 5    | 13.67 mV       | -150.8 mV | -157.9 mV | 53.7 m     | 0% -152.4     | 0% -162.8     | 2.05 mV   | -21.67 mV   | A d: 28.43 nm |
| Delta [.] |                |           |           |            |               |               |           |             |               |

Figure S22. Height profile data of AFM images of **G-Hg**

(84,81) x: 0.428  $\mu\text{m}$  y: 0.4128  $\mu\text{m}$  z: 0.0008816  $\mu\text{m}$

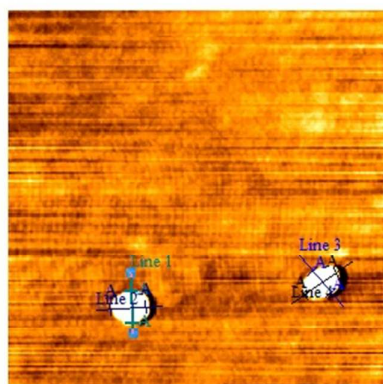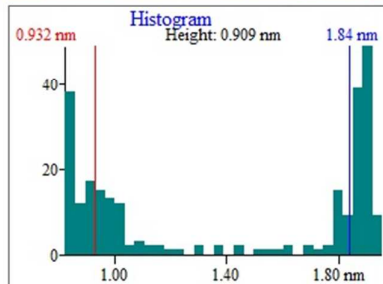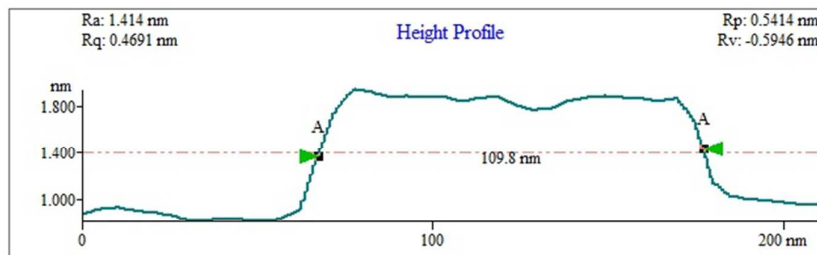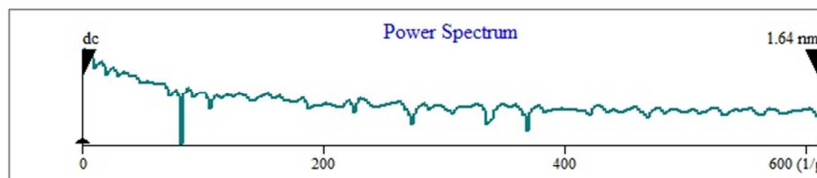

|           | Arc length | Bearing Ratio  | Bearing Ratio  | Peak (Rp) | Valley (Rv) | Cursor        |
|-----------|------------|----------------|----------------|-----------|-------------|---------------|
| Line 1    | 209.9 nm   | @30.0% 1.87 nm | @80.0% 0.89 nm | 0.5414 nm | -0.5946 nm  | A d: 109.8 nm |
| Line 2    | 230.9 nm   | @30.0% 1.87 nm | @80.0% 0.85 nm | 1.181 nm  | -1.314 nm   | A d: 123.5 nm |
| Line 3    | 235.5 nm   | @30.0% 1.74 nm | @80.0% 0.85 nm | 0.7805 nm | -0.8130 nm  | A d: 92.88 nm |
| Line 4    | 261.3 nm   | @30.0% 1.89 nm | @80.0% 0.86 nm | 0.8929 nm | -1.083 nm   | A d: 136.7 nm |
| Delta [.] |            |                |                |           |             |               |

Figure S23. Height profile data of AFM images of **G-Cd**

## 7. Powder X-ray Diffraction Data:

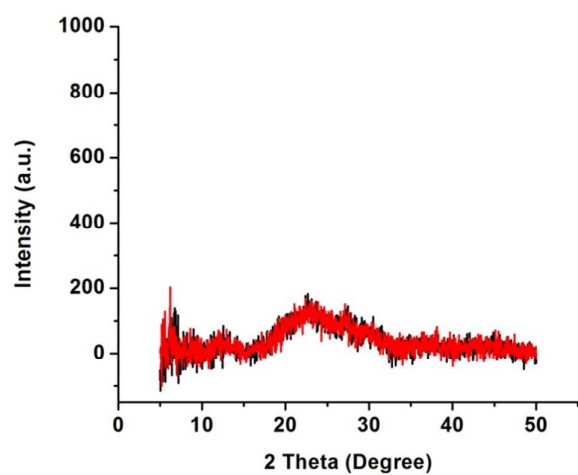

Figure S24. PXRD patterns of xerogel of **G-Pb**

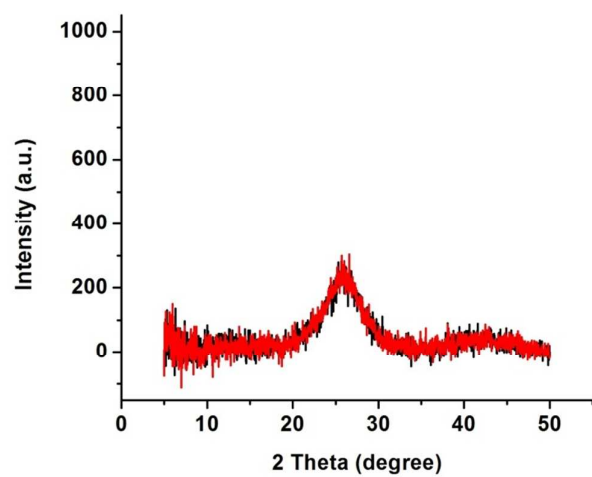

Figure S25. PXRD patterns of xerogel of **G-Hg**

## 8. Rheological Data:

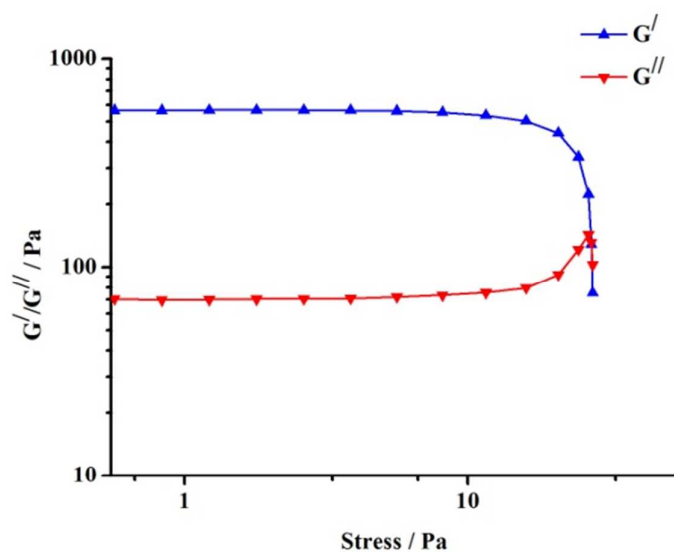

Figure S26. stress sweep data for a gel of Hydrogel

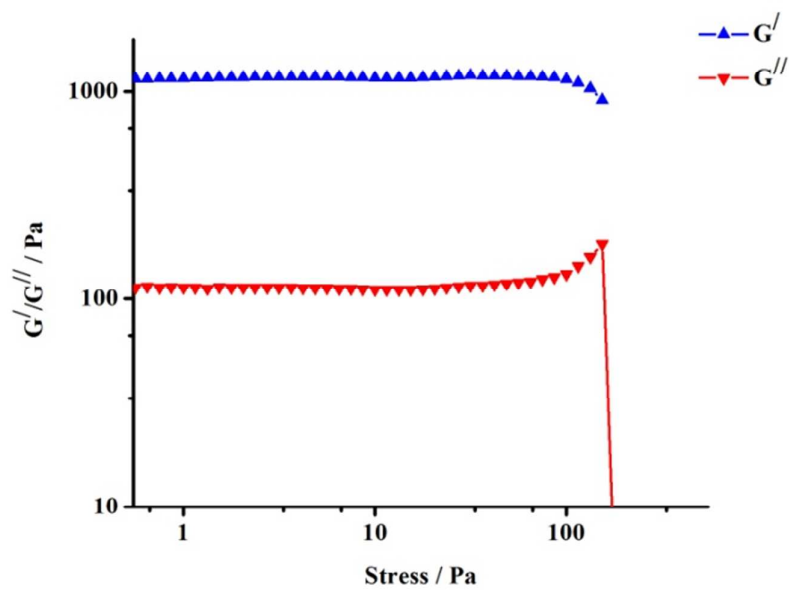

Figure S27. stress sweep data for **G-Pb**

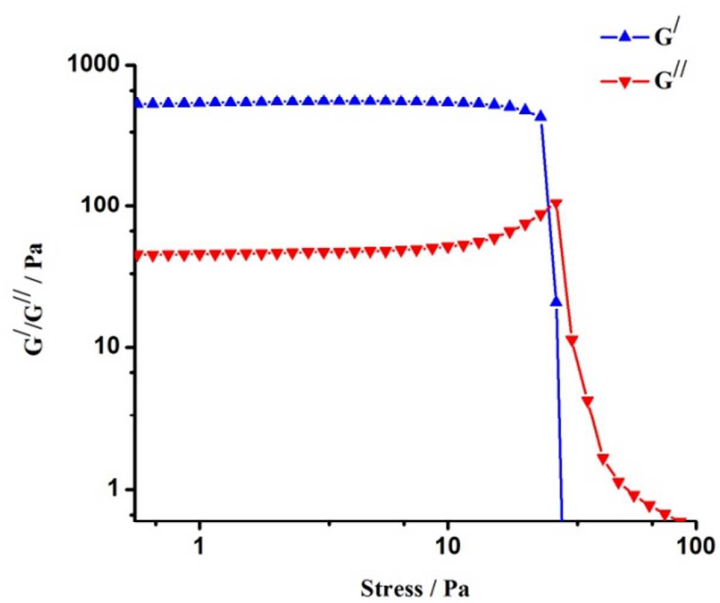

Figure S28. stress sweep data for **G-Hg**

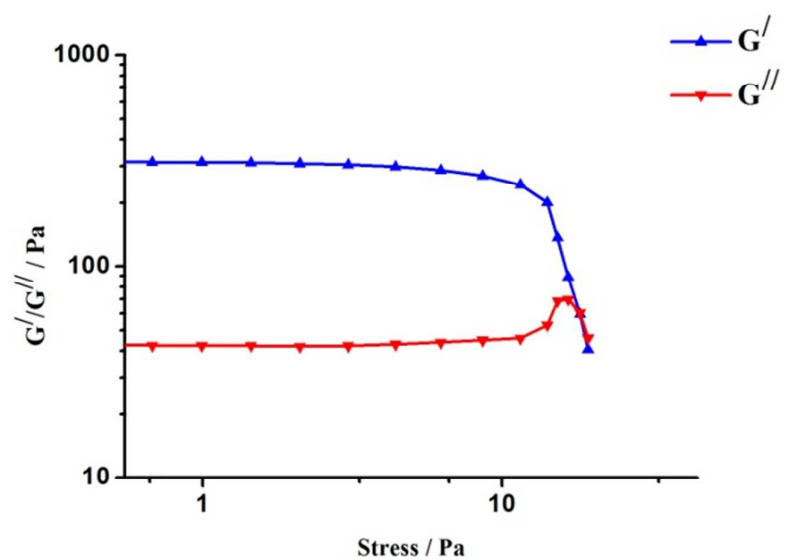

Figure S29. stress sweep data for **G-Cd**

## **9. Representative Procedure for ICP Samples:**

### **Preparation of sample for Hg estimation:**

An aliquot of 0.1 ml of solution was taken using micropipette & it was transferred into a 15 ml glass bottle. The solvent was evaporated by heating the glass bottle in an oven at 150°C for couple of hour. It was cooled to room temperature & then 5 ml of 12% HNO<sub>3</sub> (prepared from 65% Suprapur Nitric acid) was added to it & it was stirred for few minutes. It was used as ICP sample for Hg estimation. 5ml standard solution (prepared from mixing 4.5 ml 12% HNO<sub>3</sub> solution with 0.5 ml Hg standard) was prepared & it was used for calibration.

### **Preparation of sample for Pb & Cd estimation:**

Sample preparation method for Pb & Cd are same. An aliquot of 0.1 ml of solution was taken using micropipette & it was transferred into a 15 ml glass bottle. The solvent was evaporated by heating the glass bottle in an oven at 150°C for couple of hour. It was cooled to room temperature & then 5 ml of 10% HNO<sub>3</sub> (prepared from 65% Suprapur Nitric acid) was added to it & it was stirred for few minutes. It was used as ICP sample for Hg estimation. 5ml standard solution (prepared from mixing 4.5 ml 10% HNO<sub>3</sub> solution with 0.5 ml of multielement standard) was prepared & it was used for calibration.

**14. Thixotropy property:**

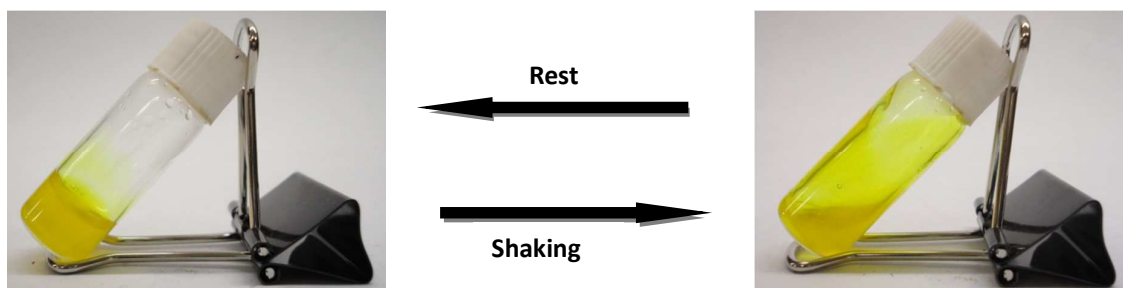

Figure S30 Images depicting thixotropic behaviour of Pb gel



**15. Gelation experiment with solvent variation & metal concentration variation:**

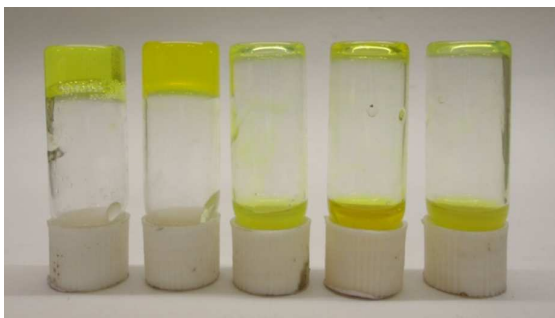

Figure S31 Variation of Water:DMSO ratio for Pb metallogelation with 1wt% BP3D & 1eqv  $\text{Pb}(\text{OAc})_2$  (Left to right- Water:DMSO = 4:1, 3:2, 1:1, 2:3, 1:4)

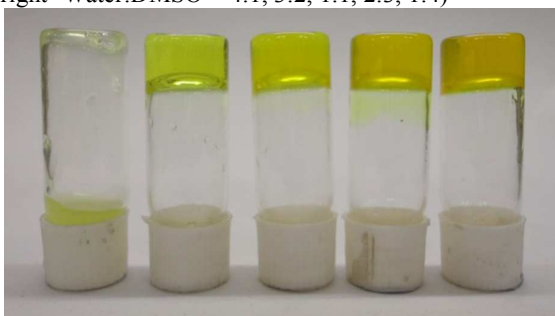

Figure S32 Variation of Pb concentration for Pb metallogelation with 1wt% BP3D & Water:DMSO = 4:1 (Left to right- equivalent of  $\text{Pb}(\text{OAc})_2$  = 1,2,3,4,5)

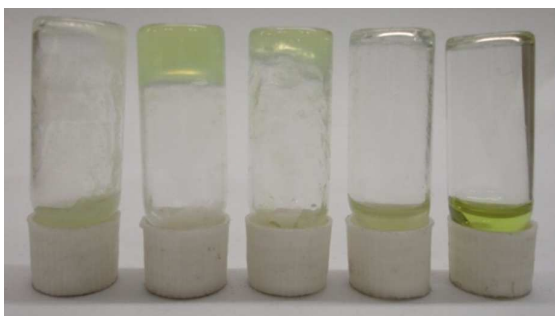

Figure S33 Variation of Water:DMSO ratio for Hg metallogelation with 1wt% BP3D & 1eqv  $\text{Hg}(\text{OAc})_2$  (Left to right- Water:DMSO = 4:1, 3:2, 1:1, 2:3, 1:4)

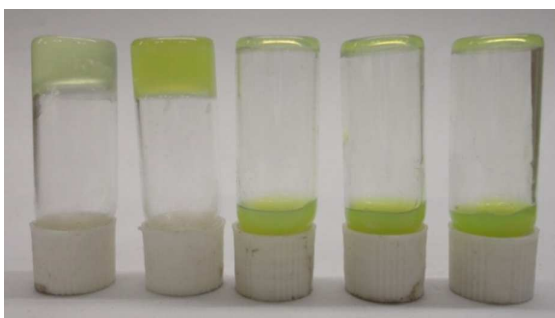

Figure S34 Variation of Hg concentration for Hg metallogelation with 1wt% BP3D & Water:DMSO = 3:2 (Left to right- equivalent of  $\text{Hg}(\text{OAc})_2$  = 1,2,3,4,5)

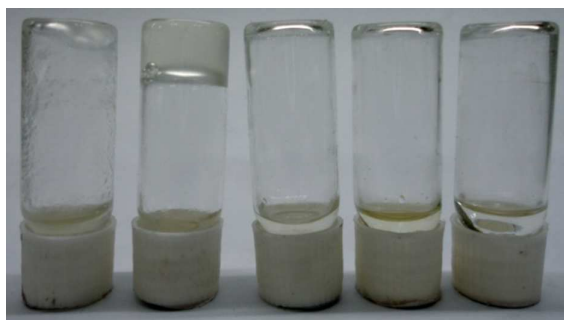

Figure S35 Variation of Water:DMSO ratio for Cd metallogelation with 1wt% BP3D & 1eqv  $\text{Cd}(\text{NO}_3)_2$  (Left to right- Water:DMSO = 4:1, 3:2, 1:1, 2:3, 1:4)

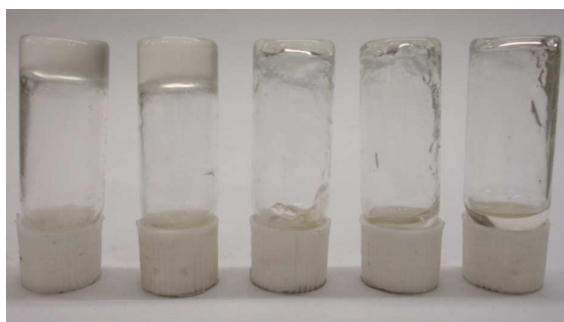

Figure S36 Variation of Cd concentration for Cd metallogelation with 1wt% BP3D & Water:DMSO = 3:2 (Left to right- equivalent of  $\text{Cd}(\text{NO}_3)_2$  = 1, 2, 3, 4, 5)

**Table S1:** Comparative study of the test for gelation of the ligand in presence of different Pb, Cd & Hg salts in DMSO/water medium

| salt                               | Appearance  |
|------------------------------------|-------------|
| Pb(OAc) <sub>2</sub>               | Gel         |
| Pb(NO <sub>3</sub> ) <sub>2</sub>  | Precipitate |
| Hg(OAc) <sub>2</sub>               | Gel         |
| Hg(NO <sub>3</sub> ) <sub>2</sub>  | Precipitate |
| HgCl <sub>2</sub>                  | Precipitate |
| Cd(OAc) <sub>2</sub>               | Precipitate |
| Cd(NO <sub>3</sub> ) <sub>2</sub>  | Gel         |
| Cd(ClO <sub>4</sub> ) <sub>2</sub> | Precipitate |

**16. Chemical responsiveness of organogel with Hg salt solution:**

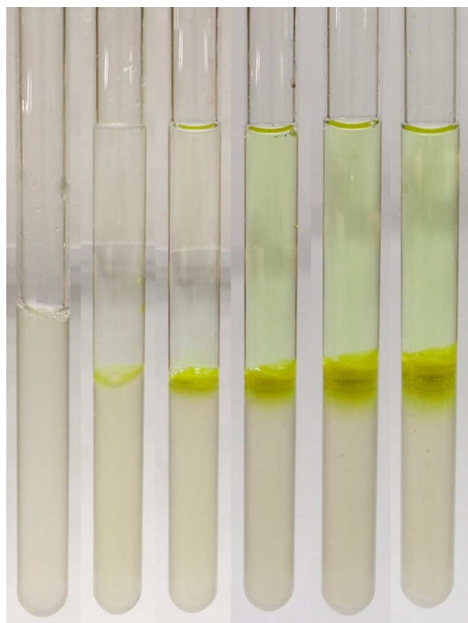

Figure S37 Set of images of effect of Hg salt solution with time (one day interval) over organogel (at righted condition with solution inside except the first one), first one is blank and second one is captured instantly after adding solution

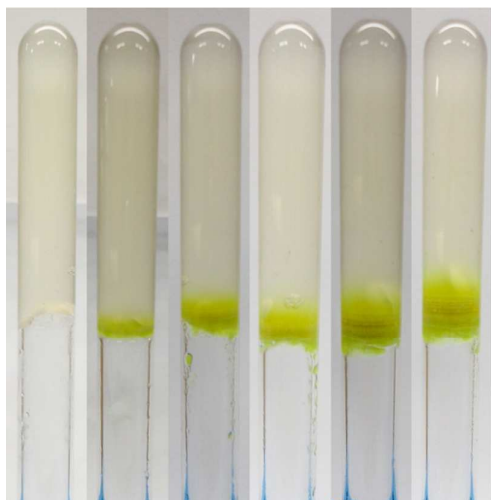

Figure S38 Set of images of effect of Hg salt solution with time (one day interval) over organogel (at inverted condition), first one is blank and second one is captured instantly after adding solution
